# Supplementary material for: Impact of COVID-19 Pandemic on Antibiotic Utilisation in Malaysian Primary Care Clinics: An Interrupted Time Series Analysis
Source: Antibiotics (Basel). 2023 Mar 28;12(4):659. doi: 10.3390/antibiotics12040659 (PMC10135109; doi:10.3390/antibiotics12040659)
Supplement: Supplementary file 1 [file antibiotics-12-00659-s001.zip › antibiotics-2301961-supplementary.pdf]

# Title

Impact of COVID-19 Pandemic on Antibiotic Utilisation in Malaysian Primary Care Clinics: An  
Interrupted Time Series Analysis

Audrey Huili Lim <sup>1,\*</sup>  
Norazida Ab Rahman <sup>1</sup>  
Hazimah Hashim <sup>2</sup>  
Mardhiyah Kamal <sup>2</sup>  
Tineshwaran Velvanathan <sup>3</sup>  
Mary Chiew Fong Chok <sup>3</sup>  
Sheamini Sivasampu <sup>1</sup>

*<sup>1</sup>Institute for Clinical Research, National Institutes of Health, Shah Alam 40170, Malaysia*

*<sup>2</sup>Pharmacy Practice & Development Division, Pharmaceutical Services Programme, Ministry of Health, Petaling Jaya 46200, Malaysia*

*<sup>3</sup>Pharmacy Policy & Strategic Planning Division, Pharmaceutical Services Programme, Ministry of Health, Petaling Jaya 46200, Malaysia*

*\*audreylim.moh@gmail.com*

## **List of Figures and Tables**

Supplementary Table S1: STROBE checklist

Supplementary Table S2: Regression models on the change of antibiotic utilisation rates by states before and after the COVID-19 pandemic

Supplementary Figure S1: Antibiotic utilisation rates by state from 2018 to 2021

Supplementary Figure S2: Autocorrelogram of antibiotic utilisation

Supplementary Figure S3: Partial autocorrelogram of antibiotic utilisation

## Supplementary Table S1: STROBE checklist

STROBE Statement—Checklist of items that should be included in reports of *cross-sectional studies*

|                          | Item No | Recommendation                                                                                                                                                                       |
|--------------------------|---------|--------------------------------------------------------------------------------------------------------------------------------------------------------------------------------------|
| Title and abstract       | 1       | (a) Indicate the study’s design with a commonly used term in the title or the abstract                                                                                               |
|                          |         | (b) Provide in the abstract an informative and balanced summary of what was done and what was found                                                                                  |
| Introduction             |         |                                                                                                                                                                                      |
| Background/rationale     | 2       | Explain the scientific background and rationale for the investigation being reported                                                                                                 |
| Objectives               | 3       | State specific objectives, including any prespecified hypotheses                                                                                                                     |
| Methods                  |         |                                                                                                                                                                                      |
| Study design             | 4       | Present key elements of study design early in the paper                                                                                                                              |
| Setting                  | 5       | Describe the setting, locations, and relevant dates, including periods of recruitment, exposure, follow-up, and data collection                                                      |
| Participants             | 6       | (a) Give the eligibility criteria, and the sources and methods of selection of participants                                                                                          |
| Variables                | 7       | Clearly define all outcomes, exposures, predictors, potential confounders, and effect modifiers. Give diagnostic criteria, if applicable                                             |
| Data sources/measurement | 8*      | For each variable of interest, give sources of data and details of methods of assessment (measurement). Describe comparability of assessment methods if there is more than one group |
| Bias                     | 9       | Describe any efforts to address potential sources of bias                                                                                                                            |
| Study size               | 10      | Explain how the study size was arrived at                                                                                                                                            |
| Quantitative variables   | 11      | Explain how quantitative variables were handled in the analyses. If applicable, describe which groupings were chosen and why                                                         |
| Statistical methods      | 12      | (a) Describe all statistical methods, including those used to control for confounding                                                                                                |
|                          |         | (b) Describe any methods used to examine subgroups and interactions                                                                                                                  |
|                          |         | (c) Explain how missing data were addressed                                                                                                                                          |
|                          |         | (d) If applicable, describe analytical methods taking account of sampling strategy                                                                                                   |
|                          |         | (e) Describe any sensitivity analyses                                                                                                                                                |
| Results                  |         |                                                                                                                                                                                      |

|                          |     |                                                                                                                                                                                                              |
|--------------------------|-----|--------------------------------------------------------------------------------------------------------------------------------------------------------------------------------------------------------------|
| Participants             | 13* | (a) Report numbers of individuals at each stage of study—eg numbers potentially eligible, examined for eligibility, confirmed eligible, included in the study, completing follow-up, and analysed            |
|                          |     | (b) Give reasons for non-participation at each stage                                                                                                                                                         |
|                          |     | (c) Consider use of a flow diagram                                                                                                                                                                           |
| Descriptive data         | 14* | (a) Give characteristics of study participants (eg demographic, clinical, social) and information on exposures and potential confounders                                                                     |
|                          |     | (b) Indicate number of participants with missing data for each variable of interest                                                                                                                          |
| Outcome data             | 15* | Report numbers of outcome events or summary measures                                                                                                                                                         |
| Main results             | 16  | (a) Give unadjusted estimates and, if applicable, confounder-adjusted estimates and their precision (eg, 95% confidence interval). Make clear which confounders were adjusted for and why they were included |
|                          |     | (b) Report category boundaries when continuous variables were categorized                                                                                                                                    |
|                          |     | (c) If relevant, consider translating estimates of relative risk into absolute risk for a meaningful time period                                                                                             |
| Other analyses           | 17  | Report other analyses done—eg analyses of subgroups and interactions, and sensitivity analyses                                                                                                               |
| <b>Discussion</b>        |     |                                                                                                                                                                                                              |
| Key results              | 18  | Summarise key results with reference to study objectives                                                                                                                                                     |
| Limitations              | 19  | Discuss limitations of the study, taking into account sources of potential bias or imprecision. Discuss both direction and magnitude of any potential bias                                                   |
| Interpretation           | 20  | Give a cautious overall interpretation of results considering objectives, limitations, multiplicity of analyses, results from similar studies, and other relevant evidence                                   |
| Generalisability         | 21  | Discuss the generalisability (external validity) of the study results                                                                                                                                        |
| <b>Other information</b> |     |                                                                                                                                                                                                              |
| Funding                  | 22  | Give the source of funding and the role of the funders for the present study and, if applicable, for the original study on which the present article is based                                                |

\*Give information separately for exposed and unexposed groups.

**Note:** An Explanation and Elaboration article discusses each checklist item and gives methodological background and published examples of transparent reporting. The STROBE checklist is best used in conjunction with this article (freely available on the Web sites of PLoS Medicine at <http://www.plosmedicine.org/>, Annals of Internal Medicine at <http://www.annals.org/>, and Epidemiology at <http://www.epidem.com/>). Information on the STROBE Initiative is available at [www.strobe-statement.org](http://www.strobe-statement.org).

**Supplementary Table S2: Regression models on the change of antibiotic utilisation rates by states before and after the COVID-19 pandemic**

| Independent variables  | Coefficient | 95% Confidence Interval | p-value |
|------------------------|-------------|-------------------------|---------|
| <b>Johor</b>           |             |                         |         |
| Trend before COVID-19  | <0.001      | -0.004 to 0.004         | 0.992   |
| Level Change           | -0.111      | -0.185 to -0.038        | 0.004   |
| Slope Change           | <-0.001     | -0.005 to 0.005         | 0.888   |
| Intercept              | 0.143       | 0.087 to 0.199          | <0.001  |
| <b>Kedah</b>           |             |                         |         |
| Trend before COVID-19  | -0.002      | -0.006 to 0.001         | 0.219   |
| Level Change           | -0.057      | -0.115 to -0.000        | 0.049   |
| Slope Change           | 0.003       | -0.001 to 0.007         | 0.173   |
| Intercept              | 0.140       | 0.077 to 0.204          | <0.001  |
| <b>Kelantan</b>        |             |                         |         |
| Trend before COVID-19  | 0.003       | -0.002 to 0.008         | 0.181   |
| Level Change           | -0.076      | -0.197 to 0.046         | 0.216   |
| Slope Change           | -0.0074     | -0.015 to 0.000         | 0.063   |
| Intercept              | 0.086       | 0.035 to 0.138          | 0.002   |
| <b>Melaka</b>          |             |                         |         |
| Trend before COVID-19  | <-0.001     | *                       | 0.921   |
| Level Change           | -0.005      | -0.012 to 0.003         | 0.504   |
| Slope Change           | <0.001      | *                       | 0.355   |
| Intercept              | 0.051       | 0.024 to 0.079          | 0.001   |
| <b>Negeri Sembilan</b> |             |                         |         |
| Trend before COVID-19  | <-0.001     | *                       | 0.356   |
| Level Change           | -0.033      | -0.072 to 0.006         | 0.098   |
| Slope Change           | 0.001       | -0.001 to 0.004         | 0.348   |
| Intercept              | 0.077       | 0.051 to 0.103          | <0.001  |
| <b>Pahang</b>          |             |                         |         |
| Trend before COVID-19  | 0.001       | -0.002 to 0.005         | 0.416   |
| Level Change           | -0.020      | -0.090 to 0.051         | 0.577   |
| Slope Change           | -0.004      | -0.009 to 0.000         | 0.068   |
| Intercept              | 0.056       | 0.018 to 0.095          | 0.005   |
| <b>Perak</b>           |             |                         |         |
| Trend before COVID-19  | -0.004      | -0.007 to -0.001        | 0.019   |
| Level Change           | -0.032      | -0.087 to 0.023         | 0.245   |
| Slope Change           | 0.005       | 0.002 to 0.009          | 0.002   |
| Intercept              | 0.129       | 0.090 to 0.169          | <0.001  |
| <b>Perlis</b>          |             |                         |         |
| Trend before COVID-19  | -0.001      | -0.002 to 0.001         | 0.326   |
| Level Change           | 0.001       | -0.015 to 0.018         | 0.860   |
| Slope Change           | <0.001      | *                       | 0.561   |
| Intercept              | 0.020       | 0.001 to 0.038          | 0.035   |
| <b>Pulau Pinang</b>    |             |                         |         |
| Trend before COVID-19  | -0.001      | -0.003 to 0.001         | 0.278   |
| Level Change           | -0.021      | -0.050 to 0.007         | 0.143   |
| Slope Change           | 0.001       | -0.001 to 0.003         | 0.173   |

|                             |         |                  |        |
|-----------------------------|---------|------------------|--------|
| Intercept                   | 0.056   | 0.029 to 0.084   | <0.001 |
| Sabah                       |         |                  |        |
| Trend before COVID-19       | 0.004   | -0.003 to 0.011  | 0.295  |
| Level Change                | -0.015  | -0.284 to -0.006 | 0.041  |
| Slope Change                | -0.001  | -0.008 to 0.007  | 0.882  |
| Intercept                   | 0.048   | -0.004 to 0.100  | 0.072  |
| Sarawak                     |         |                  |        |
| Trend before COVID-19       | 0.001   | -0.001 to 0.003  | 0.406  |
| Level Change                | -0.053  | -0.094 to -0.012 | 0.013  |
| Slope Change                | 0.002   | -0.001 to 0.004  | 0.236  |
| Intercept                   | 0.033   | 0.018 to 0.049   | <0.001 |
| Selangor                    |         |                  |        |
| Trend before COVID-19       | -0.002  | -0.007 to 0.003  | 0.392  |
| Level Change                | -0.080  | -0.176 to 0.017  | 0.103  |
| Slope Change                | 0.003   | -0.002 to 0.009  | 0.224  |
| Intercept                   | 0.154   | 0.103 to 0.205   | <0.001 |
| Terengganu                  |         |                  |        |
| Trend before COVID-19       | -0.002  | -0.004 to 0.001  | 0.192  |
| Level Change                | -0.028  | -0.074 to 0.018  | 0.225  |
| Slope Change                | 0.003   | -0.000 to 0.006  | 0.078  |
| Intercept                   | 0.087   | 0.056 to 0.118   | <0.001 |
| WP Labuan                   |         |                  |        |
| Trend before COVID-19       | <-0.001 | *                | 0.535  |
| Level Change                | -0.005  | -0.012 to 0.003  | 0.217  |
| Slope Change                | <0.001  | *                | 0.493  |
| Intercept                   | 0.009   | 0.004 to 0.015   | 0.002  |
| WP Kuala Lumpur & Putrajaya |         |                  |        |
| Trend before COVID-19       | -0.003  | -0.007 to -0.000 | 0.046  |
| Level Change                | -0.030  | -0.085 to 0.024  | 0.264  |
| Slope Change                | 0.004   | 0.001 to 0.001   | 0.020  |
| Intercept                   | 0.126   | 0.078 to 0.174   | <0.001 |

---

\* Value not reported as value range <0.0001

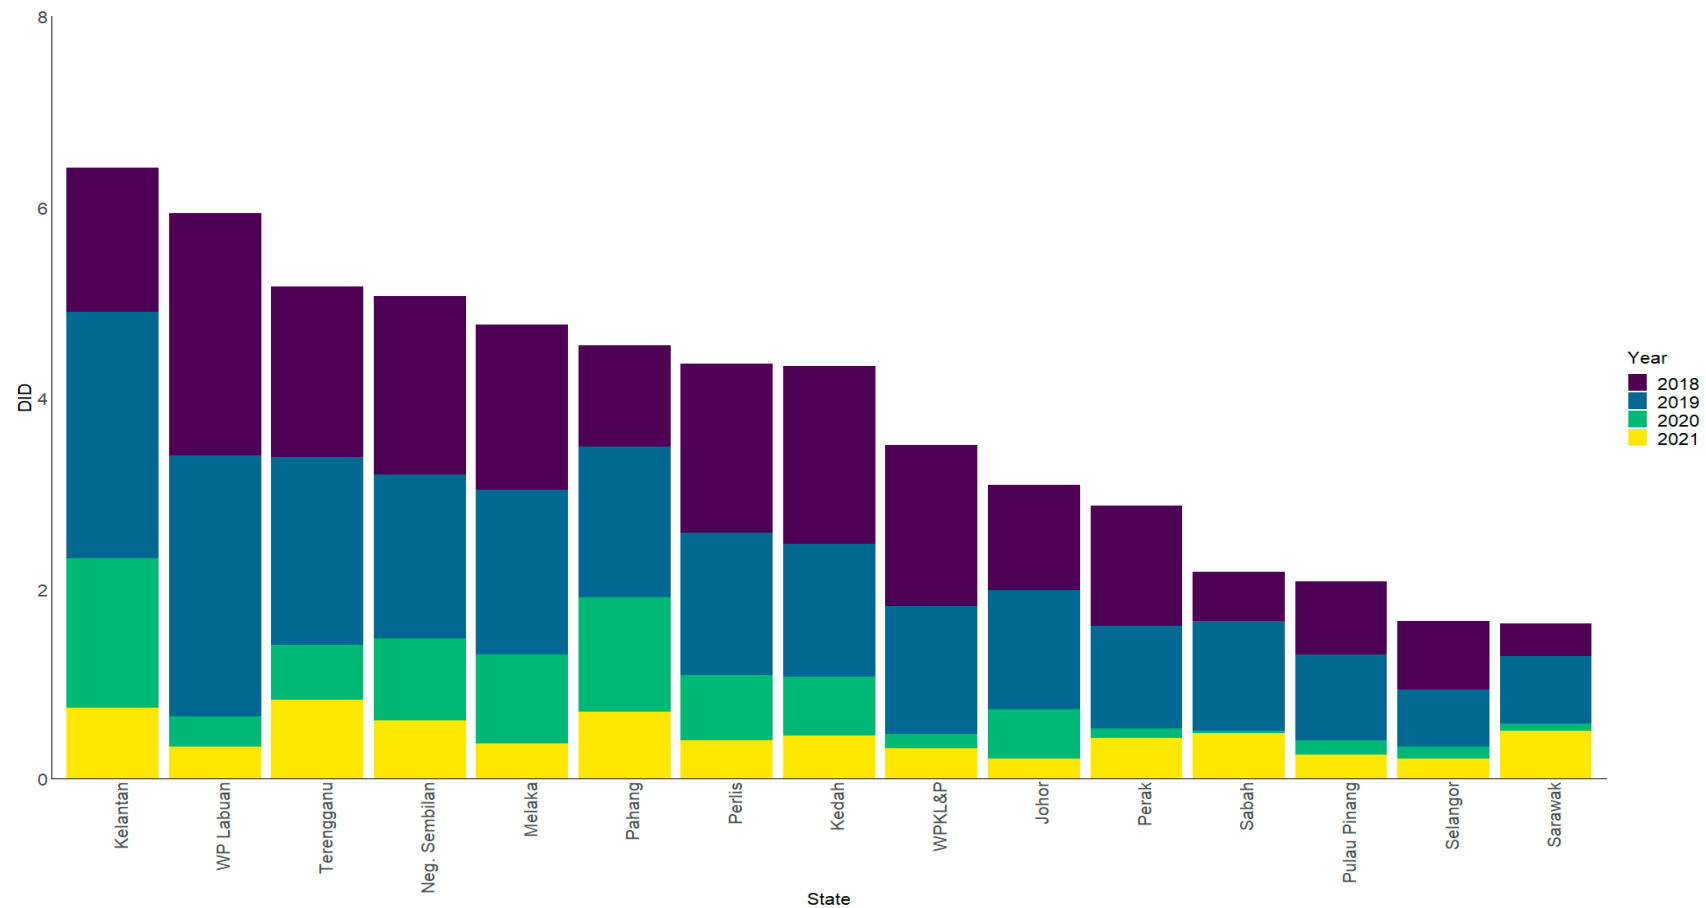

**Supplementary Figure S1: Antibiotic utilisation rates by state from 2018 to 2021**

Abbreviations: DID, defined daily dose per 1000 inhabitants per day; WPKL & P, Wilayah Persekutuan Kuala Lumpur & Putrajaya; WP Labuan, Wilayah Persekutuan Labuan

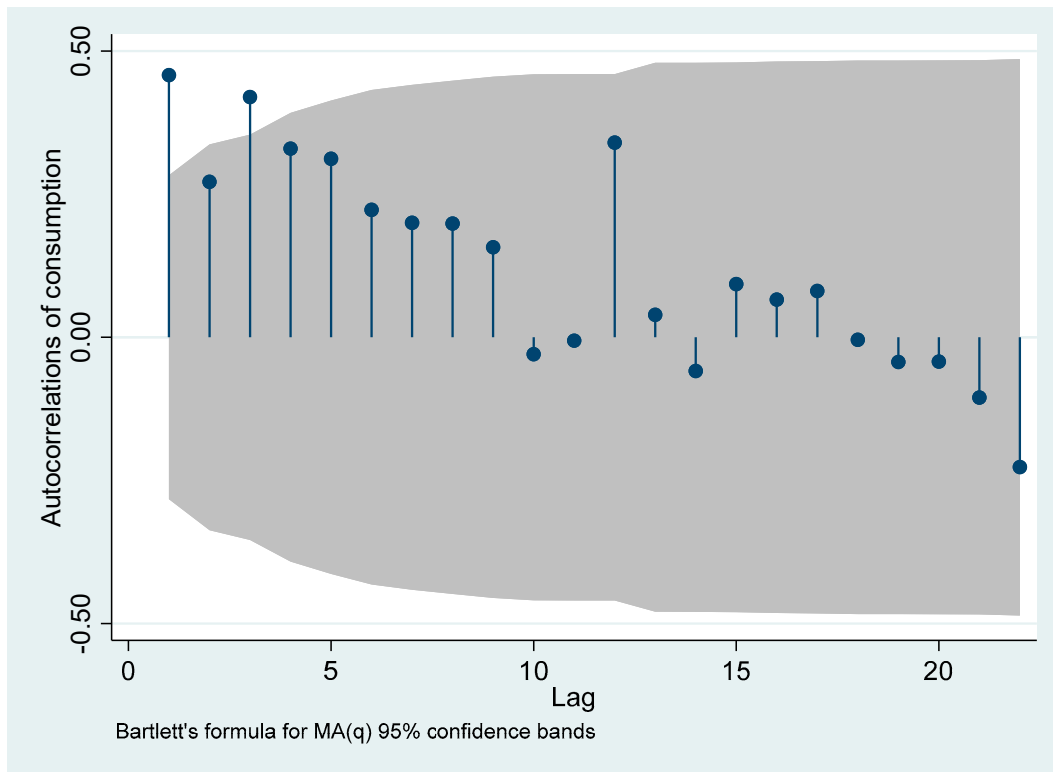

**Supplementary Figure S2: Autocorrelogram of antibiotic utilisation**

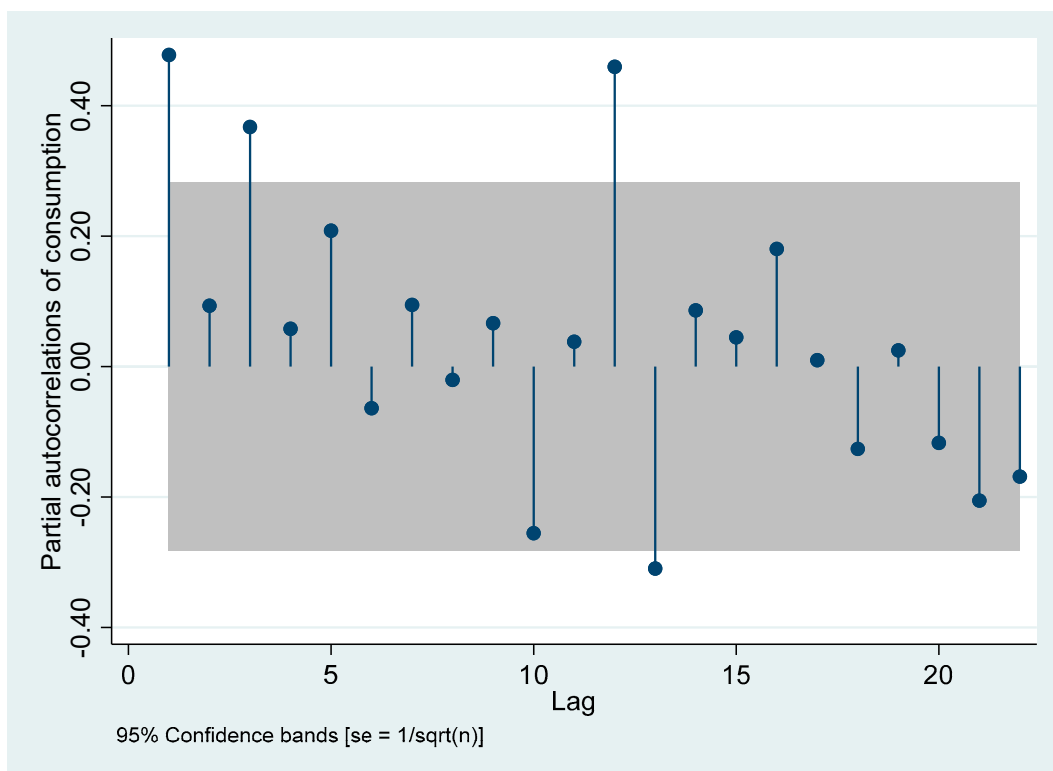

**Supplementary Figure S3: Partial autocorrelogram of antibiotic utilisation**
